# Supplementary material for: Effect of Different Exercise Interventions on Grip Strength, Knee Extensor Strength, Appendicular Skeletal Muscle Index, and Skeletal Muscle Index Strength in Patients with Sarcopenia: A Meta-Analysis of Randomized Controlled Trials
Source: MDPI journal article supplement (doi:10.3390/diseases12040071), 2024-04-02
Supplement: s1 [file s1]

Supplementary Materials S3: sensitivity analysis plot; funnel plot.

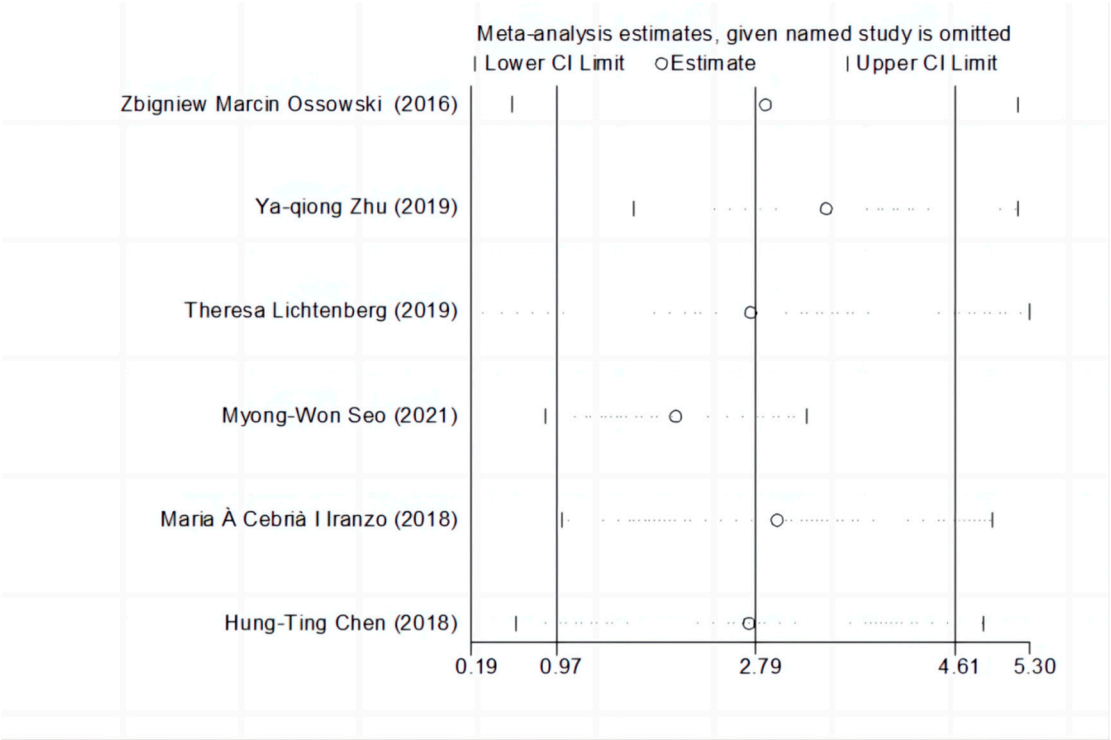

Figure 1. The sensitivity analysis results of grip strength.

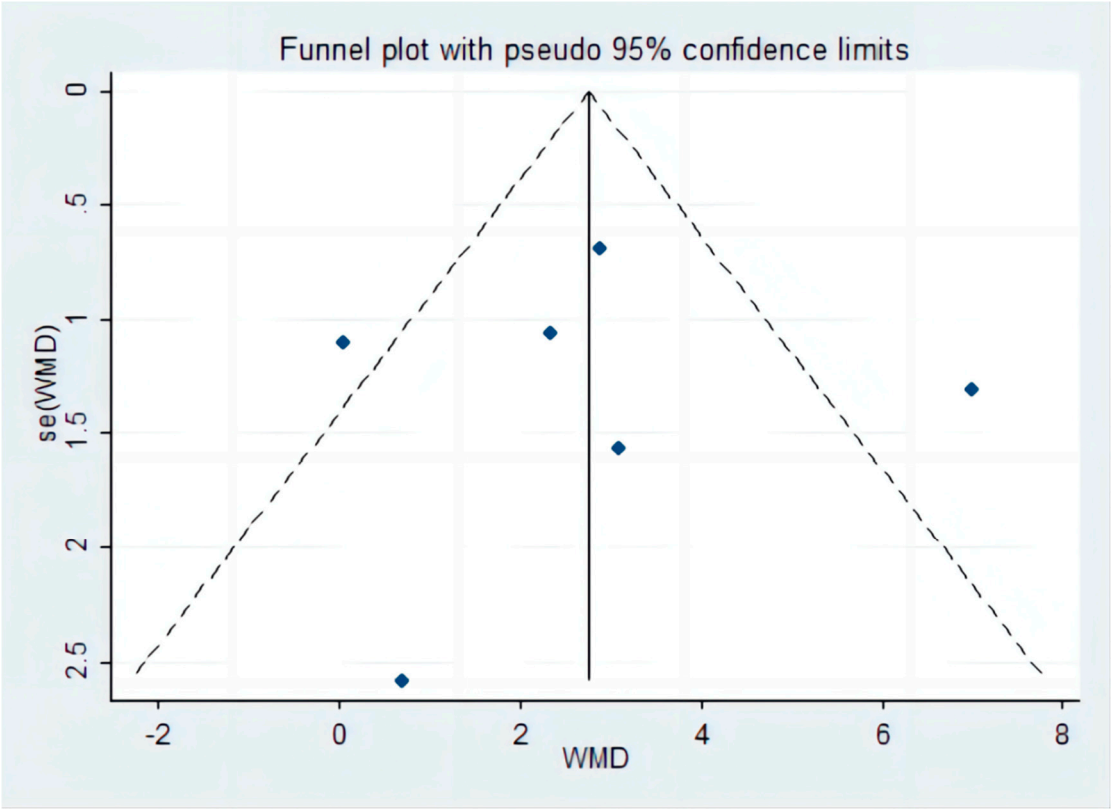

**Figure 2.** The funnel plot results of grip strength.

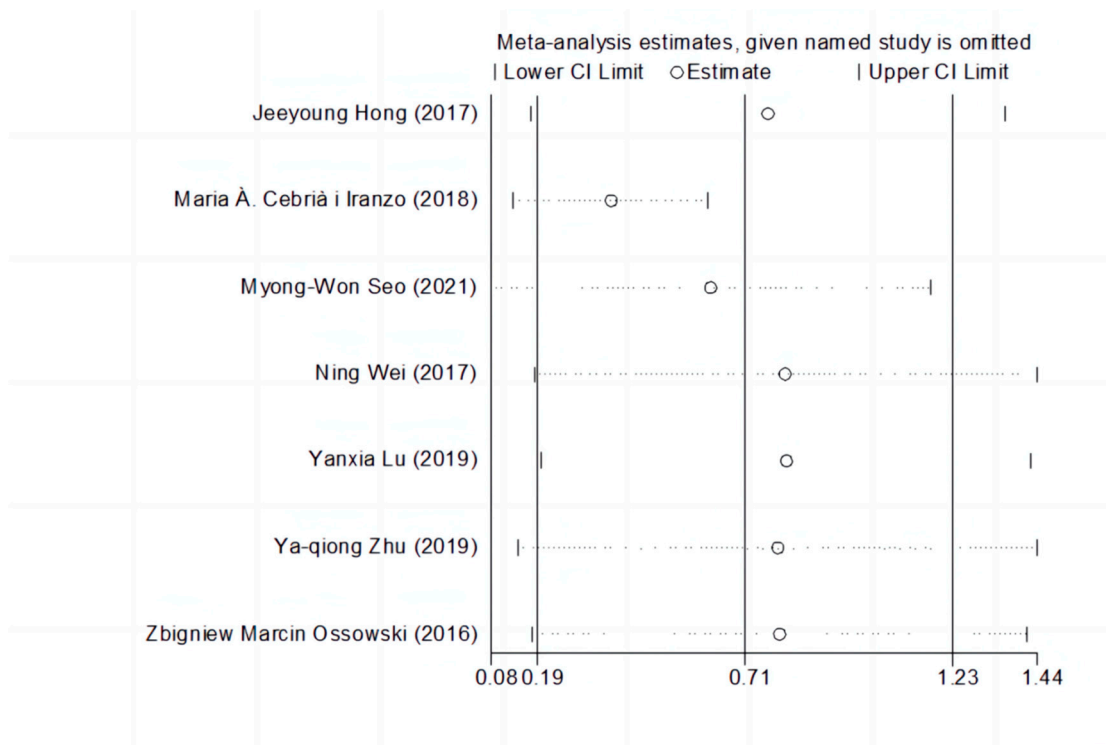

**Figure 3.** The sensitivity analysis results of knee extensor strength.

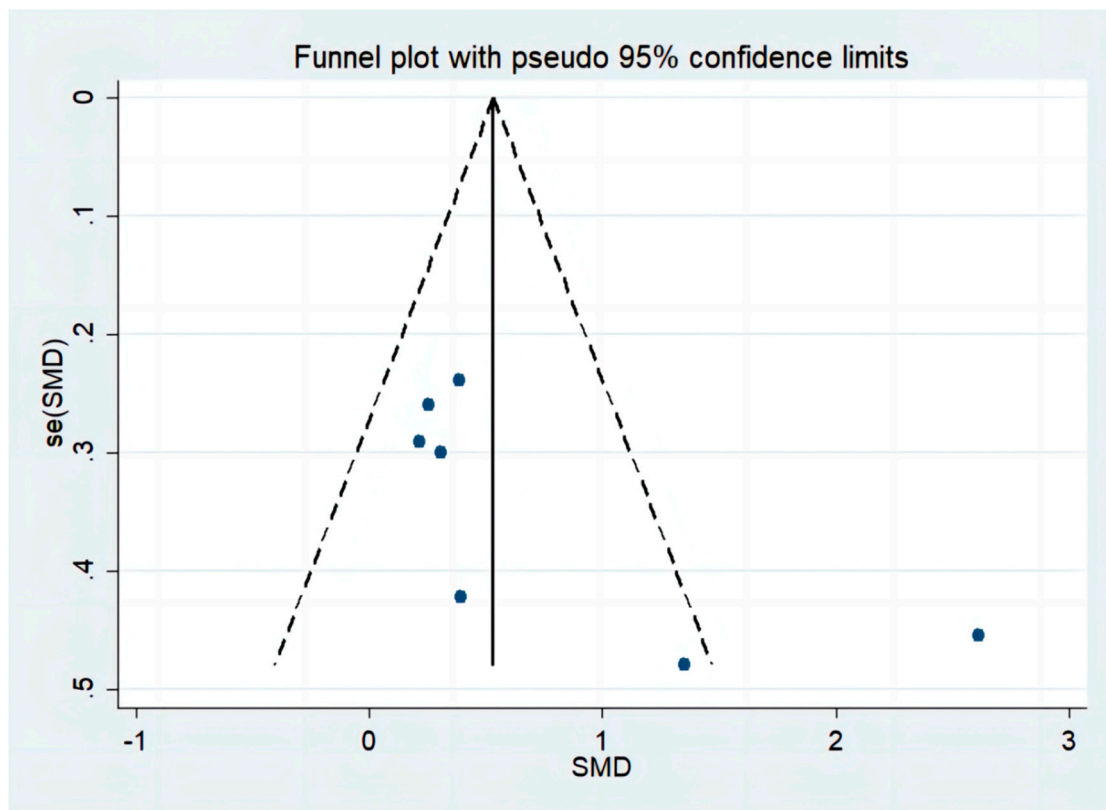

**Figure 4.** The funnel plot results of knee extensor strength.

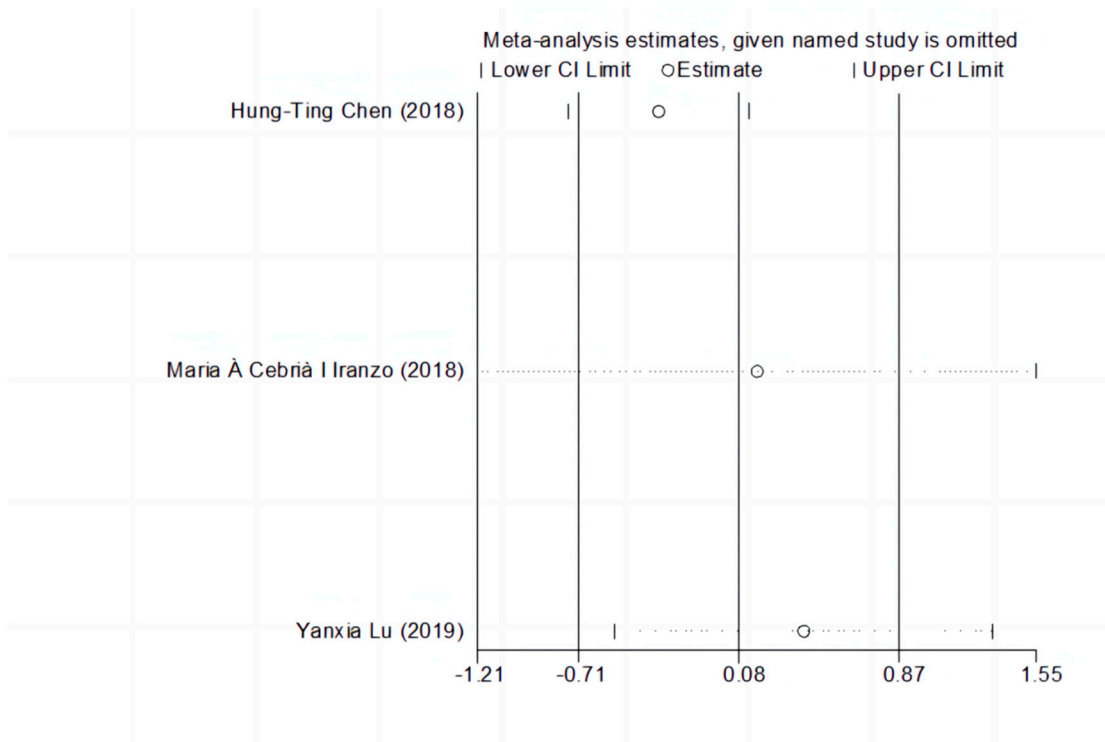

**Figure 5.** The sensitivity analysis results of appendicular skeletal muscle index.

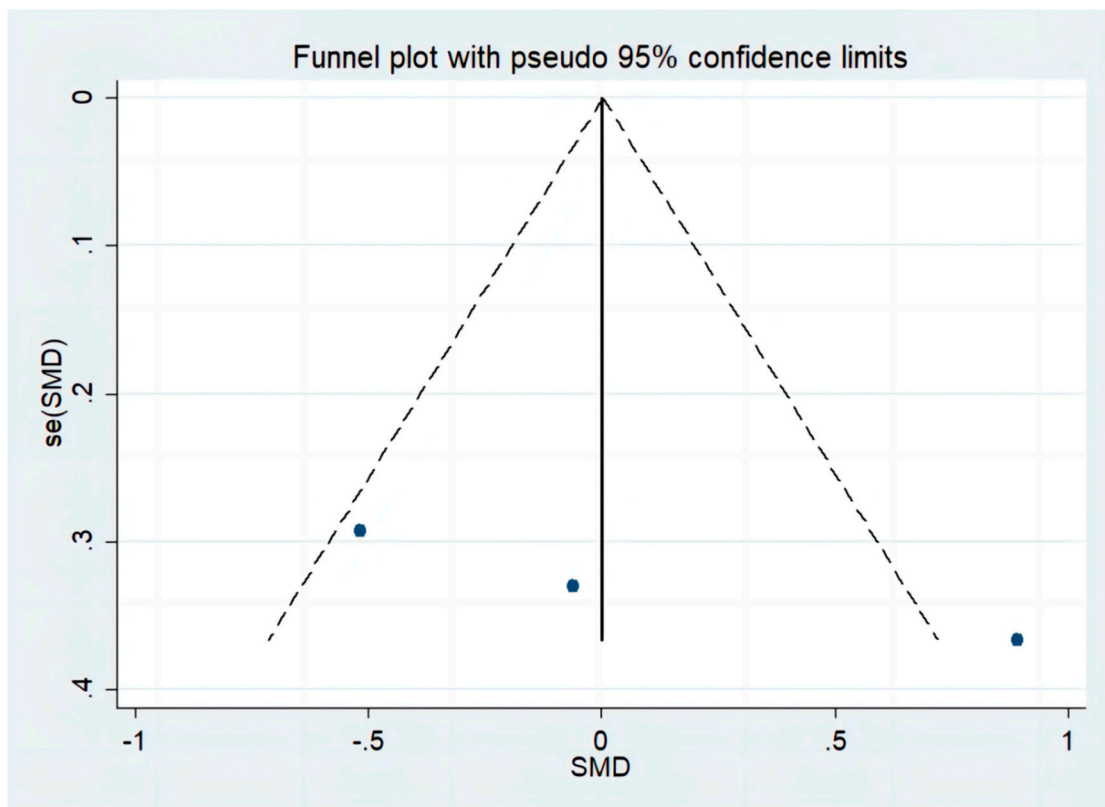

**Figure 6.** The funnel plot results of appendicular skeletal muscle index.

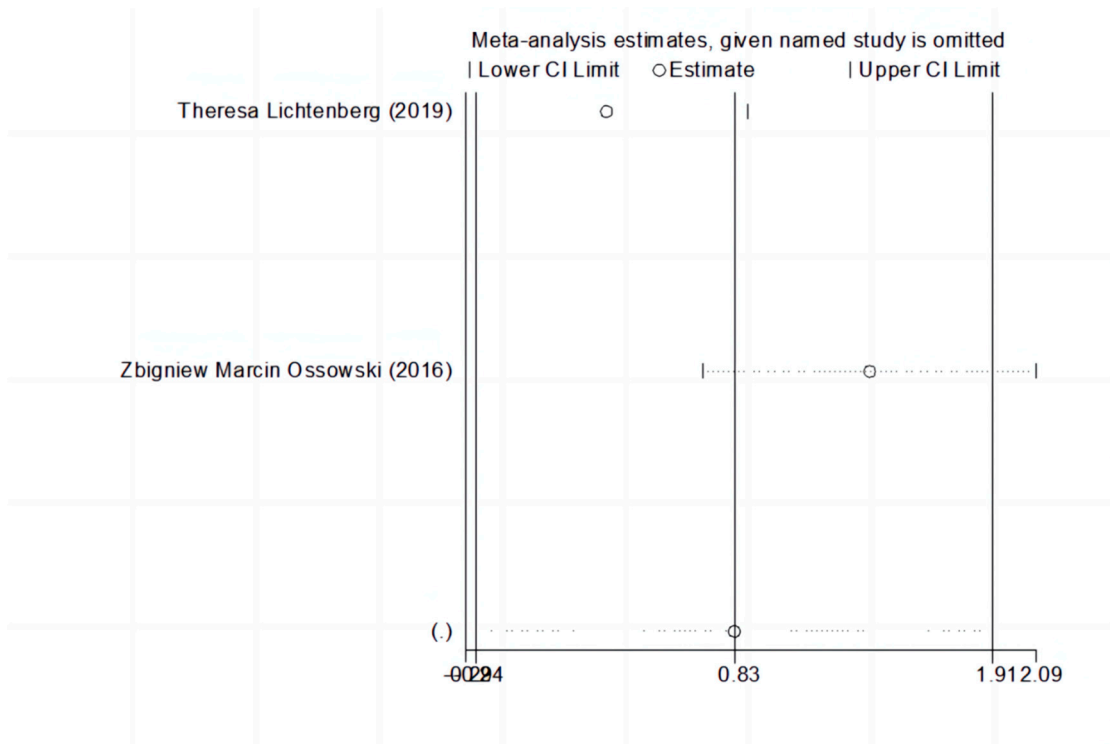

**Figure 7.** The sensitivity analysis results of appendicular skeletal muscle index.

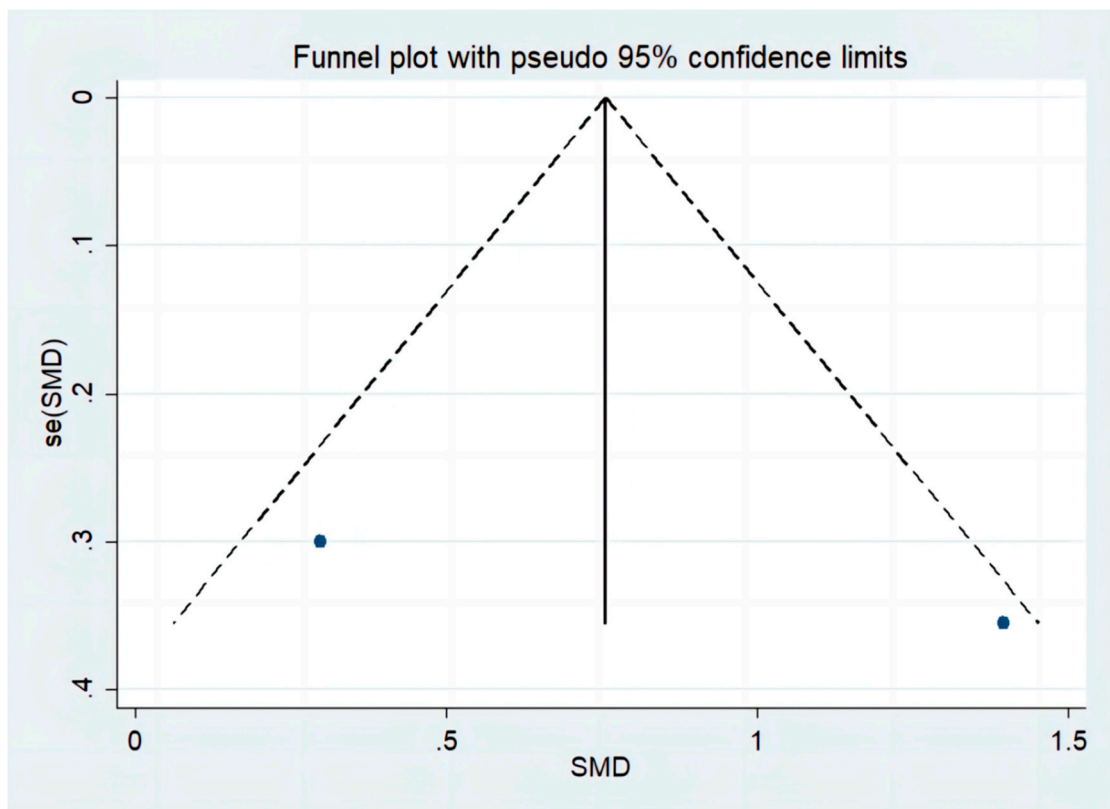

**Figure 8.** The funnel plot results of skeletal muscle index.

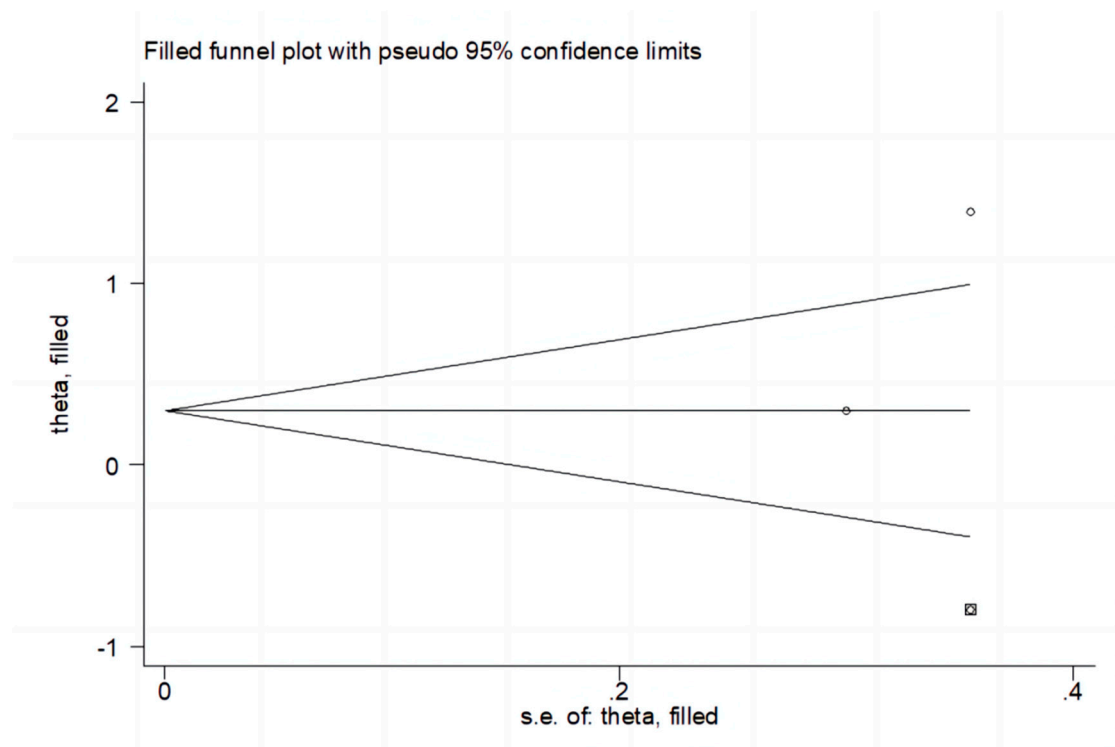

**Figure 9.** The funnel plot after trimmed.
