# Supplementary material for: Effect of Different Exercise Interventions on Grip Strength, Knee Extensor Strength, Appendicular Skeletal Muscle Index, and Skeletal Muscle Index Strength in Patients with Sarcopenia: A Meta-Analysis of Randomized Controlled Trials
Source: Diseases. 2024 Apr 2;12(4):71. doi: 10.3390/diseases12040071 (PMC11049519; doi:10.3390/diseases12040071)
Supplement: Supplementary file 1 [file diseases-12-00071-s001.zip › Supplementary Materials S2.xlsx]

## Sheet: Sheet1
		Supplementary Materials S2: : Demographic information
Author/year	Participants				Measuring method/position			Period	Exercise interventions
First author (year)	N	Setting	Country	Age	Grip strength	MM	Lower limb muscle
Yuxiang Liang (2020)	60	IP	China	87.30±5.4	EH101	BIA	-	12 Weeks	Resistance and Balance
Yanxia Lu (2019)	92	CD	Singapore	69.95±4.72	-	DXA	KES	6 Months	Combined intervention
Myong-Won Seo (2021)	22	SCC	South Korea	71.48±5.16	TKK 5001	DXA	Mid-Thigh	12 Weeks	Resistance
Hung-Ting Chen (2018)	33	CD	China	67.48±4.29	TTM	InBody 720	-	12 Weeks	Kettlebell Training
Jeeyoung Hong (2017)	23	CD	South Korea	81.83±4.9	-	DXA	-	12 Weeks	Home-based tele-exercise
Maria À Cebrià I Iranzo (2018)	37	NH	Spanish	83.05±6.7	Jamar Plus+	Bodystat® 1500MDD	KES	12 Weeks	Dumbbell training
Zbigniew Marcin Ossowski (2016)	45	-	Poland	68.70±4.43	SAEHAN	BIA	KES	12 Weeks	Nordic Walking Training
Ning Wei (2017)	80	CD	China	75.75±5.41		BIA	KES	12 Weeks	Whole-Body Vibration Training
Paolo M Cunha (2020)	62	UC&CRC	Brazil	68.92±4.98		dual-energy x-ray	KES	16 Weeks	Resistance
S Tsuzuku (2018)	86	PHC	Japan	72.86±2.12	Grip-D; Takei	-	KES	12 Weeks	Resistance
Ya-qiong Zhu (2019)	79	CD	China	88.6±3.8	Jamar	DXA	KES	8 Weeks	Whole-Body Vibrating Therapy
Theresa Lichtenberg (2019)	43	CD	Germany	78.52±4.13	Jamar	BIA	-	6 Months	High-Intensity Resistance Training
Kamran Hosseinzadeh Ghasemabad (2022)	60	PA	Malaysia	69.2±2.6	-	BCM	-	12 Weeks	High-, Moderate-, and Low-resistance Training
IP: inpatient; CD: community-dwelling; SCC: senior citizen center; NH: nursing homes; UC: university community; CRC: central region of the city; PHC: public health center; PA: public areas; MM: muscle mass; DXA: dual-energy x-ray; BIA: bioelectrical impedance analysis; BCM: Body Composition Monitor; KES: knee extension strength
